# Supplementary material for: Gold-stabilized carboxymethyl dextran nanoparticles for image-guided photodynamic therapy of cancer
Source: Royal Society of Chemistry journal article supplement (doi:10.1039/c7tb01099k), 2017-01-01
Supplement: c7tb01099k1.pdf [file c7tb01099k1.pdf]

Supplementary Material

Gold-Stabilized Carboxymethyl Dextran  
Nanoparticles for Image-Guided Photodynamic  
Therapy of Cancer

Minchang Lee,<sup>‡a</sup> Hansang Lee,<sup>‡a</sup> N. Vijayakameswara Rao,<sup>a</sup> Hwa Seung Han,<sup>a</sup> Sangmin Jeon,<sup>a</sup>  
Jueun Jeon,<sup>a</sup> Seokyung Lee,<sup>a</sup> Seunglee Kwon,<sup>a</sup> Yung Doug Suh<sup>a,b</sup> and Jae Hyung Park<sup>\*a</sup>

<sup>a</sup>School of Chemical Engineering, Sungkyunkwan University, Suwon 16419, Republic of Korea

<sup>b</sup>Research center for Convergence Nanobiotechnology (RC2NT), Korea Research Institute of  
Chemical Technology (KRICT), Daejeon 305-600, Republic of Korea

• Corresponding Author

Tel: +82-31-290-7288, Fax: +82-31-299-6857, E-mail: [jhpark1@skku.edu](mailto:jhpark1@skku.edu)

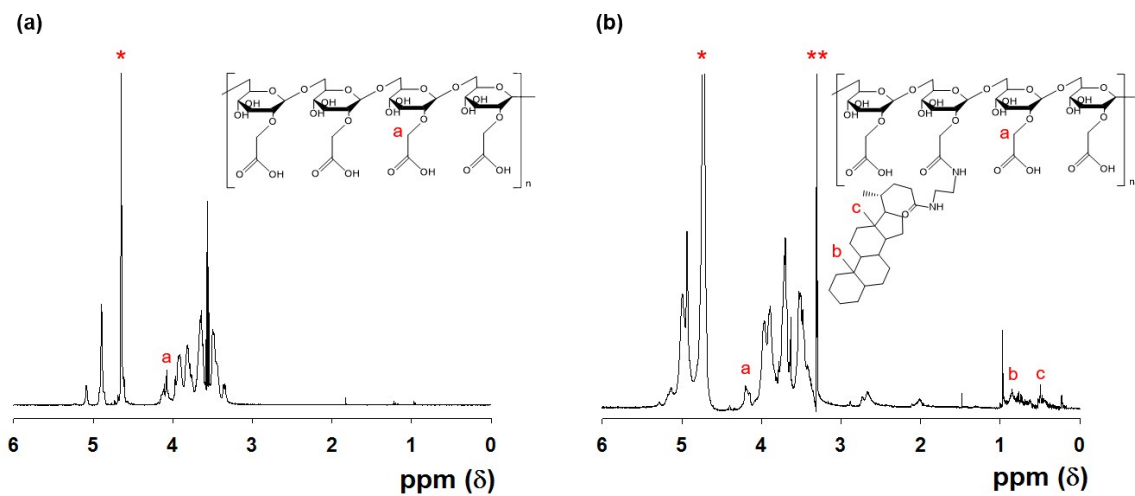

**Fig. S1.** <sup>1</sup>H-NMR spectra of (a) CMD (500 MHz, D<sub>2</sub>O) and (b) CMD-CA conjugate (500 MHz, D<sub>2</sub>O/CD<sub>3</sub>OD)

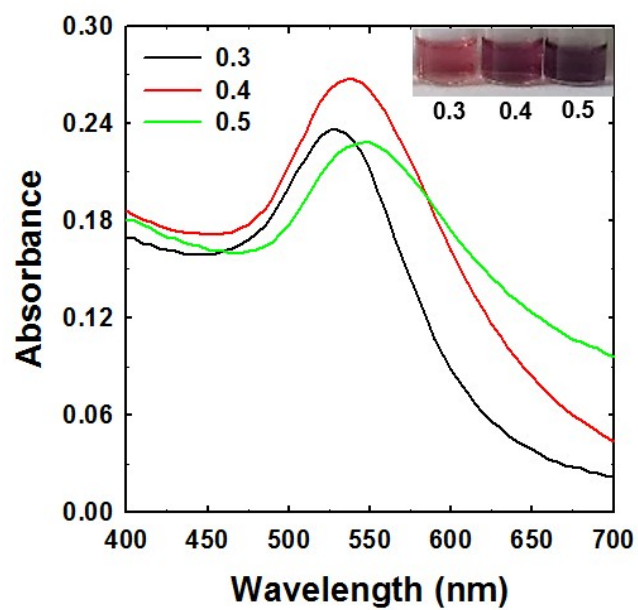

**Fig. S2.** UV/Vis spectra and a photograph of the GS-CNPs for different feed ratios of HAuCl<sub>4</sub> and tertiary amine.

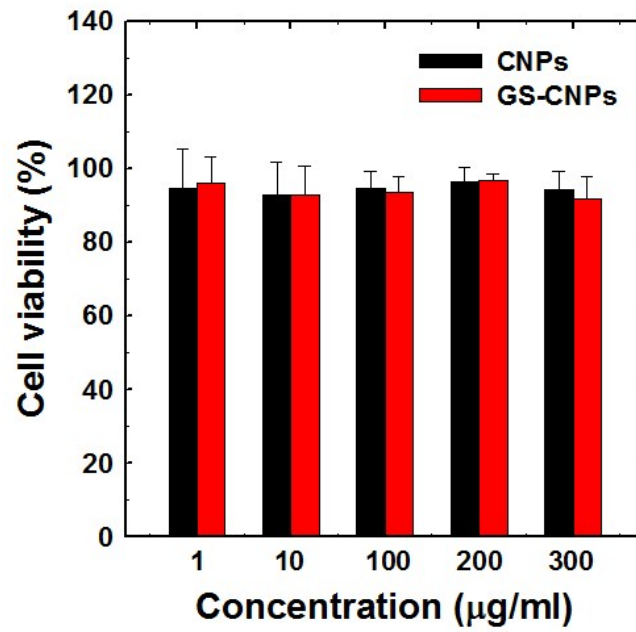

**Fig. S3.** *In vitro* cytotoxicity assessment. SCC7 cells were treated with different concentrations of CNPs or GS-CNPs.

**Table S1.** Physicochemical characteristics of CNPs. The characteristics were examined depending on the degree of substitution of the hydrophobic moiety.

| <b>Sample</b>   | <b>Feed ratio<sup>a</sup></b> | <b>DS of CA<sup>b</sup></b> | <b>Size (nm)<sup>c</sup></b> |
|-----------------|-------------------------------|-----------------------------|------------------------------|
| <b>CNPs(5)</b>  | <b>0.10</b>                   | <b>5.4</b>                  | <b>131.5±0.7</b>             |
| <b>CNPs(10)</b> | <b>0.20</b>                   | <b>9.6</b>                  | <b>160.8±1.4</b>             |
| <b>CNPs(15)</b> | <b>0.40</b>                   | <b>14.1</b>                 | <b>208.2±0.6</b>             |

<sup>a</sup> Molar feed ratio of EtCA to sugar residues of CMD polymer

<sup>b</sup> Degree of substitution calculated using <sup>1</sup>H-NMR

<sup>c</sup> Measured by dynamic light scattering in PBS
